# Supplementary material for: Dynamical Analysis of an SEIT Epidemic Model with Application to Ebola Virus Transmission in Guinea
Source: Hindawi journal article supplement (doi:10.1155/2015/582625), 2015-01-01
Supplement: f1 [file 582625.f1.pdf]

# **Dynamical analysis of an SEIT epidemic model with application to Ebola virus transmission in Guinea**

Highlights (for review)

---

- This paper introduces an SEIT epidemic model (susceptible, exposed in the latent period, infectious, treatment) to analyze the dynamical transmission of Ebola virus.
- The basic reproduction number is defined. The mathematical analysis on the existence and stability of the disease-free equilibrium and endemic equilibrium is given.
- By the least squares method and the recognized infectious and death cases in Guinea, parameters of the model are estimated and the estimated value of the basic reproduction number is obtained.
- The sensitivity and uncertainty property of the basic reproduction number is discussed by partial rank correlation coefficients.
